# Supplementary material for: Light emission of a polyfluorene derivative containing complexed europium ions
Source: Royal Society of Chemistry journal article supplement (doi:10.1039/c5cp03567h), 2015-01-01
Supplement: c5cp03567h1.pdf [file c5cp03567h1.pdf]

Electronic Supplementary Information to

## **Light Emission of a Polyfluorene Derivative Containing Complexed Europium Ions**

Denis A. Turchetti<sup>a</sup>, Mariela M. Nolasco<sup>b</sup>, Daiane Szczerbowski<sup>c</sup>, Luís D. Carlos<sup>b\*</sup>, Leni C. Akcelrud<sup>a\*</sup>.

<sup>a</sup> Paulo Scarpa Polymer Laboratory (LaPPS), Federal University of Parana, CP 19081, Curitiba/PR, 81531-990, Brazil.

<sup>b</sup> Physics Department and CICECO Aveiro Institute of Materials, University of Aveiro, 3810-193 Aveiro, Portugal.

<sup>c</sup> Semiochemicals Laboratory, Federal University of Parana, CP 19081, Curitiba/PR 81531-990, Brazil.

\* Correspondence to: Dr. Leni C. Akcelrud, Chemistry Department, Federal University of Parana, P.O.BOX 19081, Zip Code 81.531-990 Curitiba, Parana, Brazil; Dr. Luis D. Carlos, Physics Department and CICECO Aveiro Institute of Materials, University of Aveiro, 3810-193 Aveiro, Portugal.

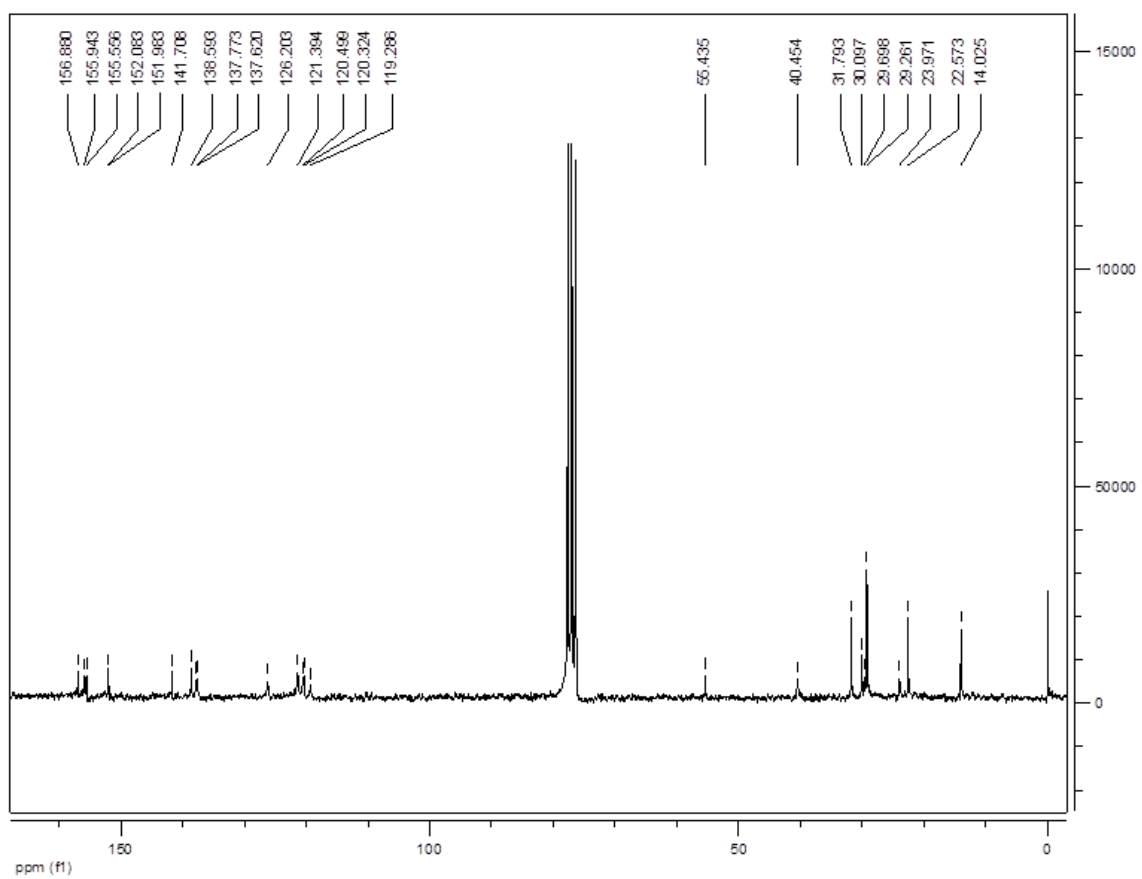

Figure S1:  $^{13}\text{C}$  NMR of LaPPS66

Table S1: Chemical shifts of  $^{13}\text{C}$  NMR of LaPPS66

| $n^\circ$     | $\delta(\text{ppm})$ |
|---------------|----------------------|
| 1, 17         | 14.02                |
| 2, 16         | 22.57                |
| 3, 15         | 23.97                |
| 4, 14         | 29.26                |
| 5, 13         | 29.69                |
| 6, 12         | 30.09                |
| 7, 11         | 31.79                |
| 8, 10         | 40.45                |
| 9             | 55.43                |
| 36, 38        | 119.28               |
| 33, 41        | 120.32               |
| 21, 26        | 120.49               |
| 19, 28        | 121.39               |
| 22, 25        | 126.20               |
| <b>30, 43</b> | <b>137.62</b>        |
| 32, 42        | 137.77               |
| <b>20, 27</b> | <b>138.59</b>        |
| 23, 24        | 141.70               |
| 37            | 151.98               |
| 18, 29        | 152.08               |
| 31, 44        | 155.55               |
| 34, 40        | 155.94               |
| 35, 39        | 156.88               |

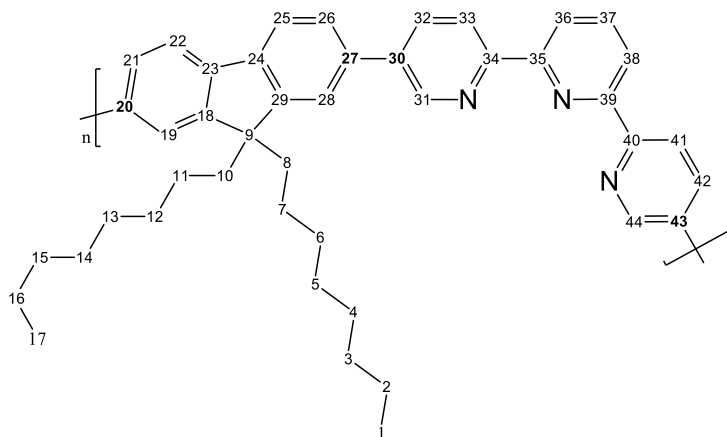

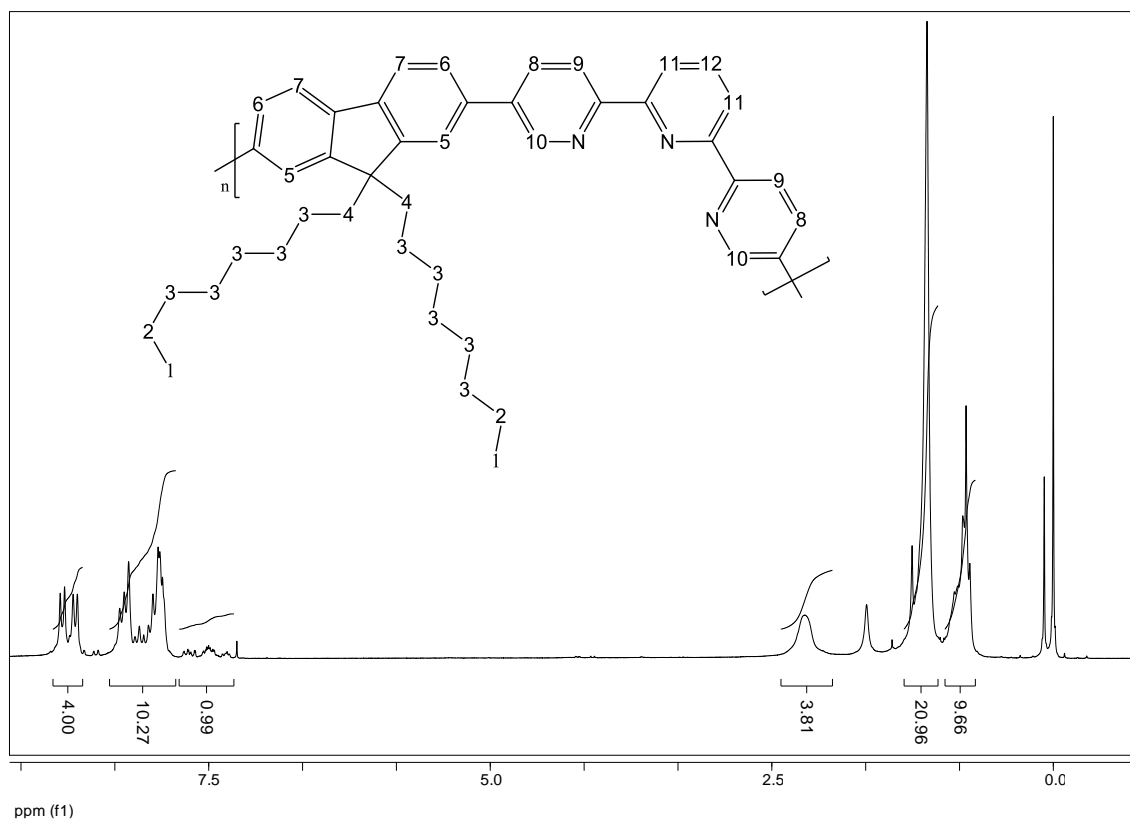

Figure S2:  $^1\text{H}$  NMR of LaPPS66

Table S2: Chemical shifts of  $^1\text{H}$  NMR of LaPPS66

| $n^\circ$  | $\delta(\text{ppm})$ | $n^\circ$ of protons |
|------------|----------------------|----------------------|
| 1, 2       | 0.70 – 0.95          | 9.66                 |
| 3          | 1.03 - 1.32          | 20.96                |
| 4          | <b>1.96 – 2.42</b>   | <b>3.81</b>          |
| 5,6,7,8,11 | 7.79 – 8.38          | 10.36                |
| 9,10       | 8.62 – 8.90          | 4.00                 |
| 12         | 7.28 – 7.76          | 0.99                 |

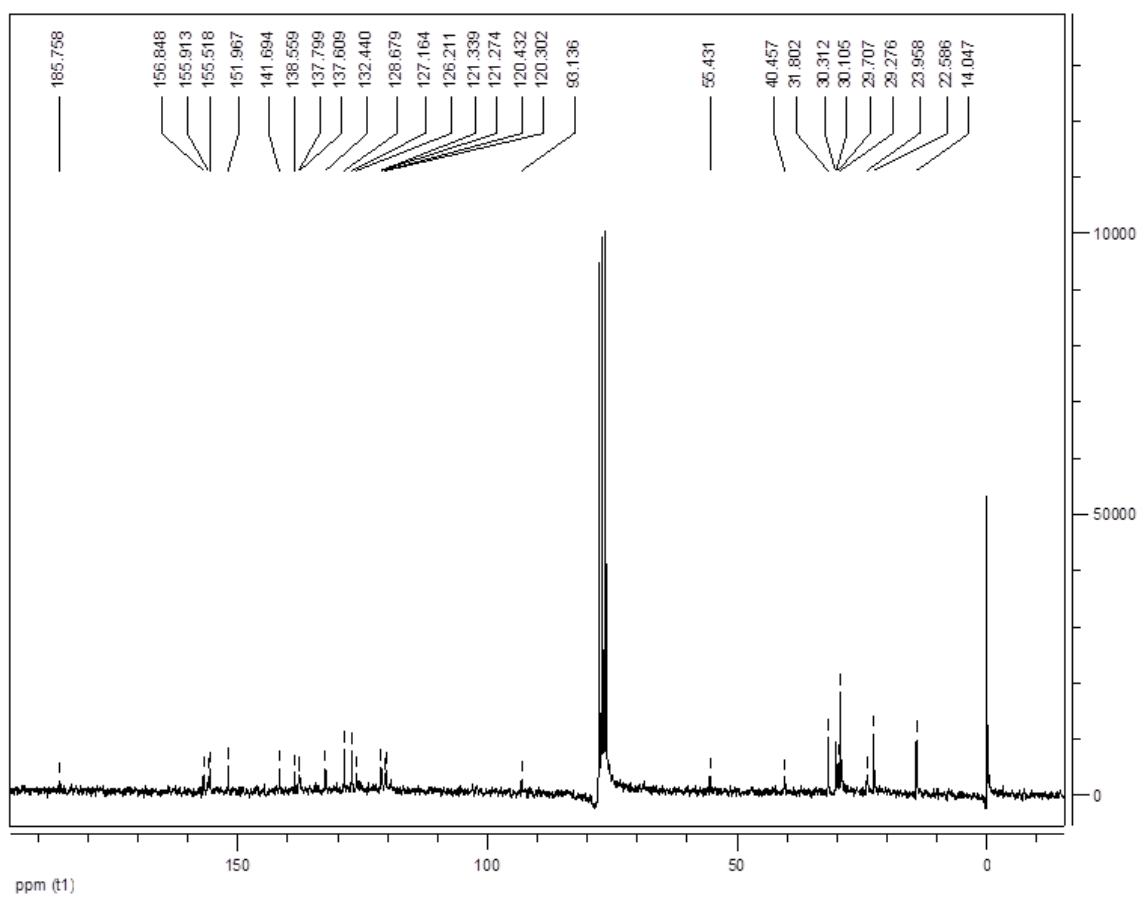

Figure S3:  $^{13}\text{C}$  NMR of LaPPS66Eu

Table S3: Chemical shifts of  $^{13}\text{C}$  NMR of LaPPS66Eu

| $n^\circ$      | $\delta(\text{ppm})$ |
|----------------|----------------------|
| 1, 17          | 14.04                |
| 2, 16          | 22.58                |
| 3, 15          | 23.95                |
| 4, 14          | 29.27                |
| 5, 13          | 29.70                |
| 6, 12          | 30.10                |
| 7, 11          | 31.80                |
| 8, 10          | 40.45                |
| 9              | 55.43                |
| <b>45</b>      | <b>93.13</b>         |
| 36, 38         | 120.30               |
| 33, 41         | 120.43               |
| 21, 26         | 121.27               |
| 19, 28         | 121.33               |
| 22, 25         | 126.21               |
| 51, 56, 58, 49 | 127.16               |
| 48, 52, 55, 59 | 128.67               |
| 50, 57         | 132.44               |
| <b>30, 43</b>  | <b>137.62</b>        |
| 32, 42         | 137.79               |
| <b>20, 27</b>  | <b>138.55</b>        |
| 23, 24         | 141.69               |
| 37             | 151.96               |
| 31, 44         | 155.51               |
| 34, 40         | 155.91               |
| 35, 39         | 156.84               |
| 46, 53         | 185.75               |

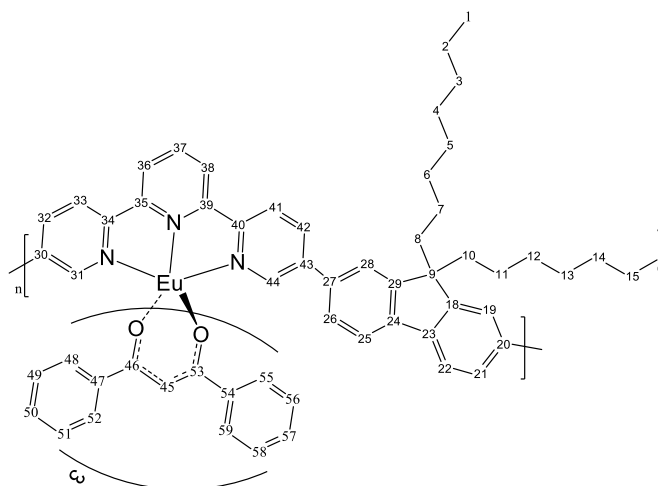

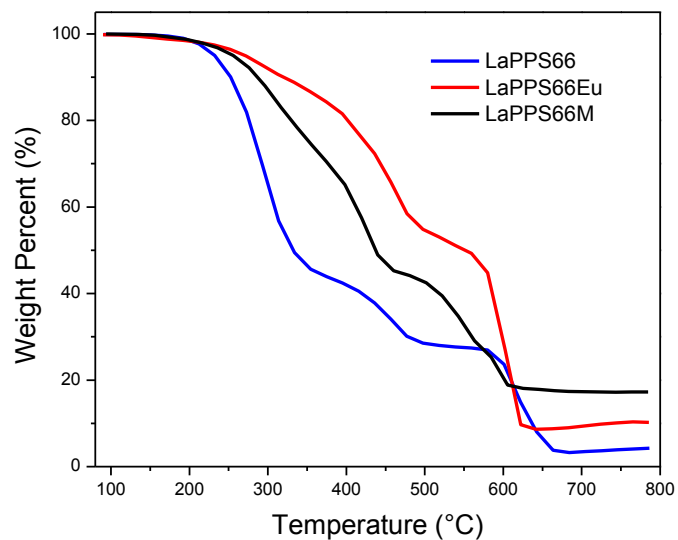

Figure S4: TGA of LaPPS66 (blue line), LaPPS66Eu (red line) and LaPPS66M (black line).

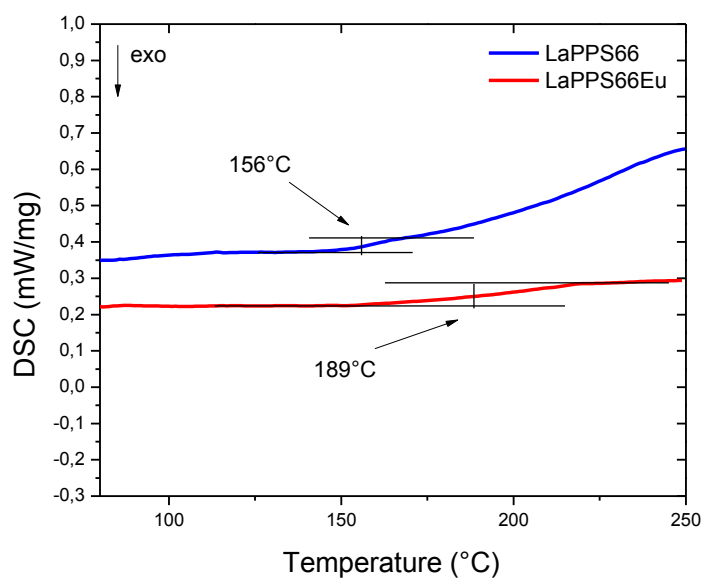

Figure S5: DSC analysis of LaPPS66 (black line) and LaPPS66Eu (red line).

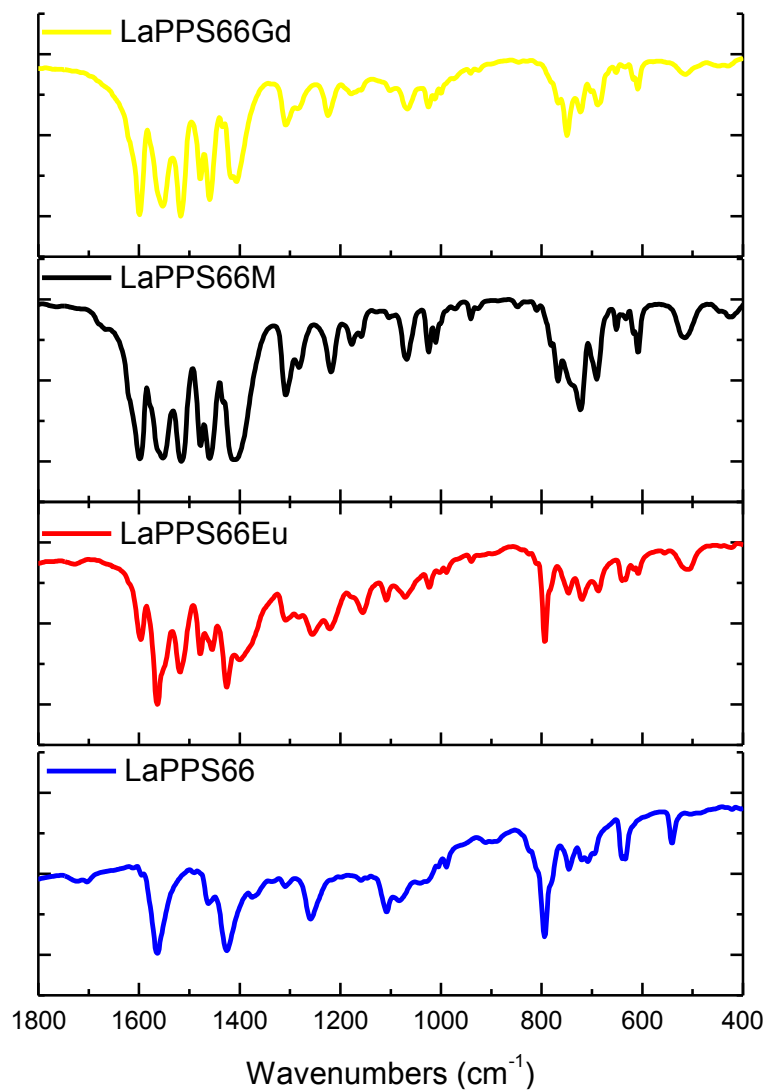

Figure S6: FT-IR analysis



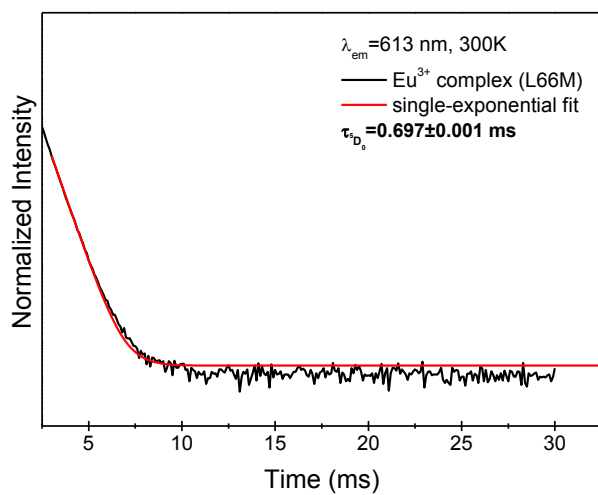

(a)

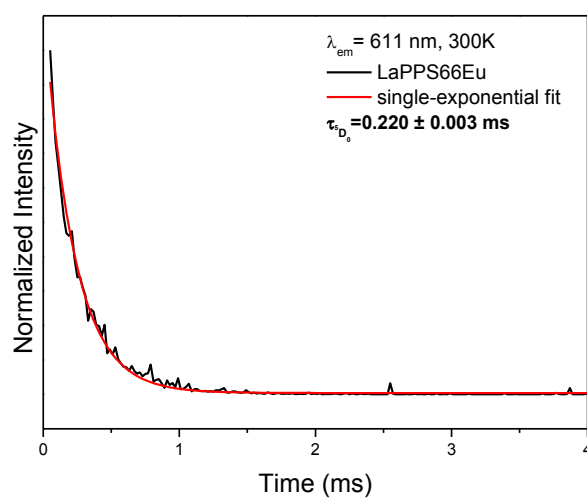

(b)

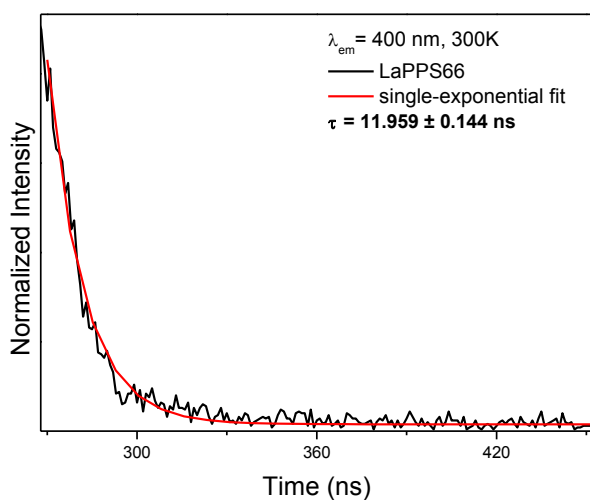

(c)

Figure S7: Decay curves. a) LaPPS66M  $\lambda_{exc} = 355 \text{ nm}$ ; b) LaPPS66Eu  $\lambda_{exc} = 365 \text{ nm}$ ;  
 c) LaPPS66  $\lambda_{exc} = 330 \text{ nm}$

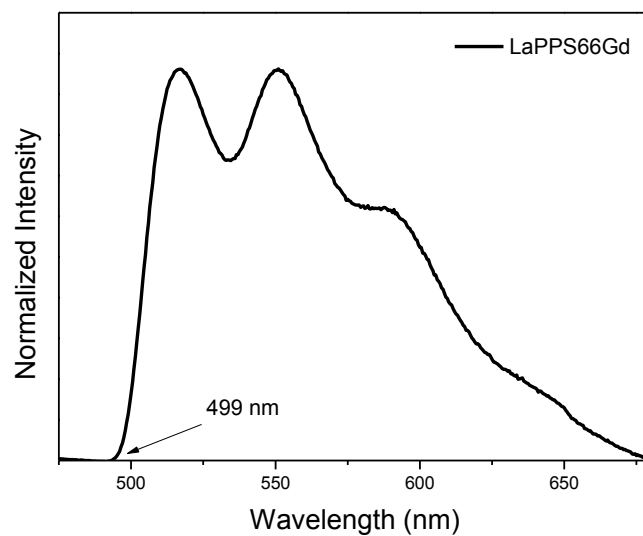

Figure S8: Normalized emission spectra of LaPPS66Gd in solid state at 11 K.

$$\lambda_{\text{exc}} = 416\text{nm}$$

Table S4: Absolute quantum yield

|                  | $\lambda_{\text{max}}1$ (nm) | $\Phi1$ | $\lambda_{\text{max}}2$ (nm) | $\Phi2$ | $\lambda_{\text{max}}3$ (nm) | $\Phi3$ |
|------------------|------------------------------|---------|------------------------------|---------|------------------------------|---------|
| <b>LaPPS66</b>   | 270                          | 0.16    | 379                          | 0.10    | ---                          | ---     |
| <b>LaPPS66Eu</b> | 276                          | <0.01   | 365                          | <0.01   | 390                          | <0.01   |
| <b>LaPPS66M</b>  | 355                          | 0.53    | 412                          | 0.31    | 420                          | 0.28    |

Table S5: Partial molecular orbital compositions, in the ground-state singlet ( $S_0$ ), for the LaPPS66M and LaPPS66Eu compounds. H stands for HOMO and L stands for LUMO.

| Orbital | LaPPS66M |           | LaPPS66Eu |           |
|---------|----------|-----------|-----------|-----------|
|         | DBM (%)  | Terpy (%) | DBM (%)   | Terpy (%) |
| H-1     | 98.62    | 1.38      | 98.36     | 1.64      |
| H       | 98.91    | 1.09      | 98.61     | 1.39      |
| L+3     | 94.13    | 5.87      | 95.15     | 4.85      |
| L+4     | 97.01    | 2.99      | 94.80     | 5.20      |

Table S6: Calculated TD-B3LYP vertical electronic excitation energies related with the triplet states, in the ground-state singlet ( $S_0$ ), for the LaPPS66M and LaPPS66Eu compounds.

| LaPPS66M       | Composição <sup>[a]</sup> | CI <sup>[b]</sup> | LaPPS66Eu      | Composição <sup>[a]</sup> | CI <sup>[b]</sup> |
|----------------|---------------------------|-------------------|----------------|---------------------------|-------------------|
|                | H-1→L+3                   | 0.48244           |                | H-1→L+3                   | 0.38075           |
| T <sub>1</sub> | H-1→L+4                   | 0.23150           | T <sub>1</sub> | H-1→L+4                   | 0.26388           |
|                | H→L+3                     | 0.29603           |                | H→L+3                     | 0.36461           |

[a] Only the three primary transitions are reported; H stands for HOMO and L stands for LUMO.

[b] The CI coefficients are in absolute values.
